# Supplementary material for: Modification of Xanthan Gum for a High-Temperature and High-Salinity Reservoir
Source: MDPI journal article supplement (doi:10.3390/polym13234212), 2021-12-01
Supplement: s1 [file s1]

# Modification of Xanthan Gum for a High Temperature and Salinity Reservoir

Mohamed Said<sup>1</sup>, Bashirul Haq<sup>1,\*</sup>, Dhafer Al Shehri<sup>1</sup>, Mohammad Mizanur Rahman<sup>2</sup>, Nasiru Salahu Muhammed<sup>1</sup> and Mohamed Mahmoud<sup>1</sup>.

<sup>1</sup> College of Petroleum Engineering and Geosciences, King Fahd University of Petroleum & Minerals, Dhahran, 34464, Saudi Arabia

<sup>2</sup> Interdisciplinary Research Center for Advanced Materials, King Fahd University of Petroleum & Minerals, Dhahran, 34464, Saudi Arabia

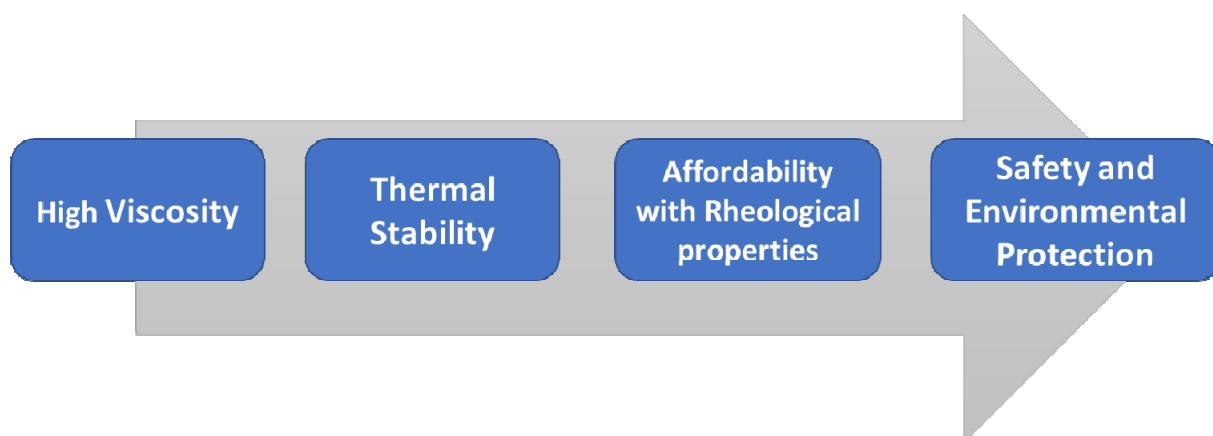

**Figure S1.** Advantages of xanthan gum (Gbadamosi et al., 2019; Muhammed et al., 2020).

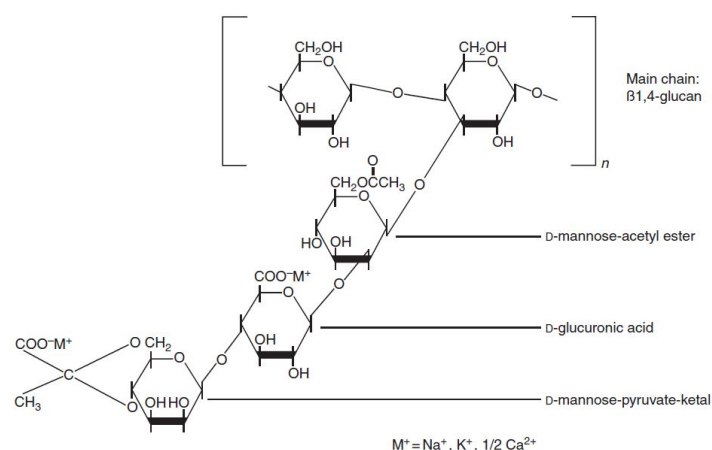

**Figure S2.** Chemical structure of xanthan gum (Wever et al., 2011).

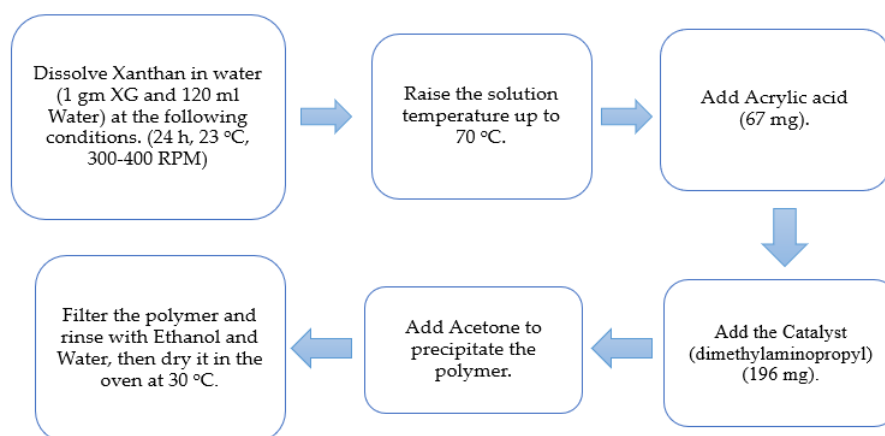

**Figure S3.** Process flow diagram of chemical synthesis.

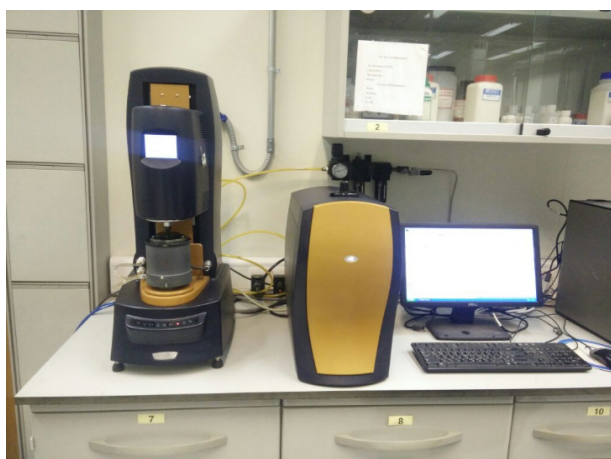

**Figure S4.** The Discovery hybrid rheometer.

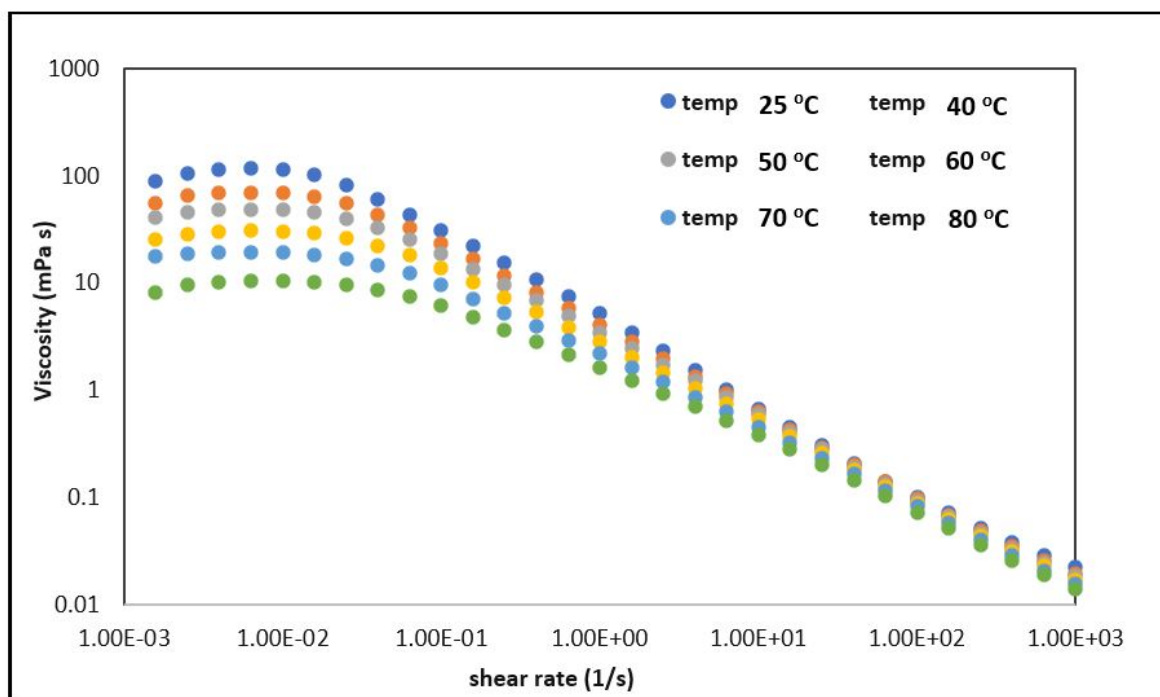

Figure S5. 0.5% xanthan viscosity vs. shear rate at different temperatures.

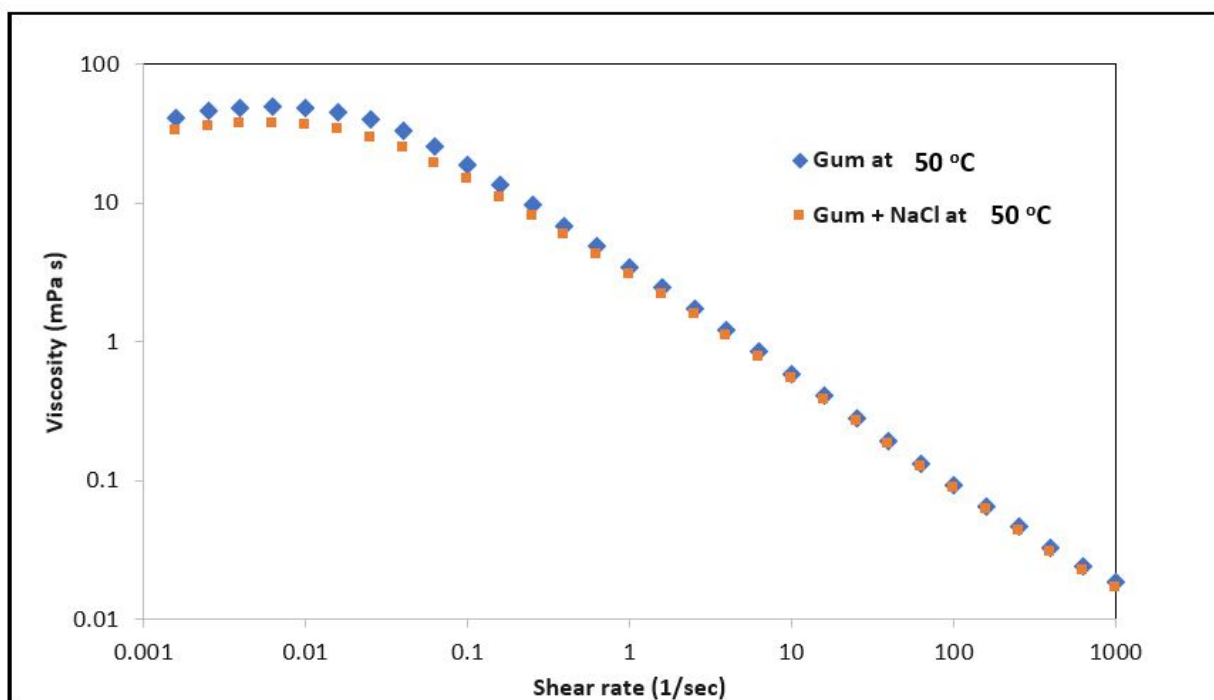

Figure S6. Effect of adding NaCl to 0.5% xanthan viscosity vs. shear rate at 50 °C.

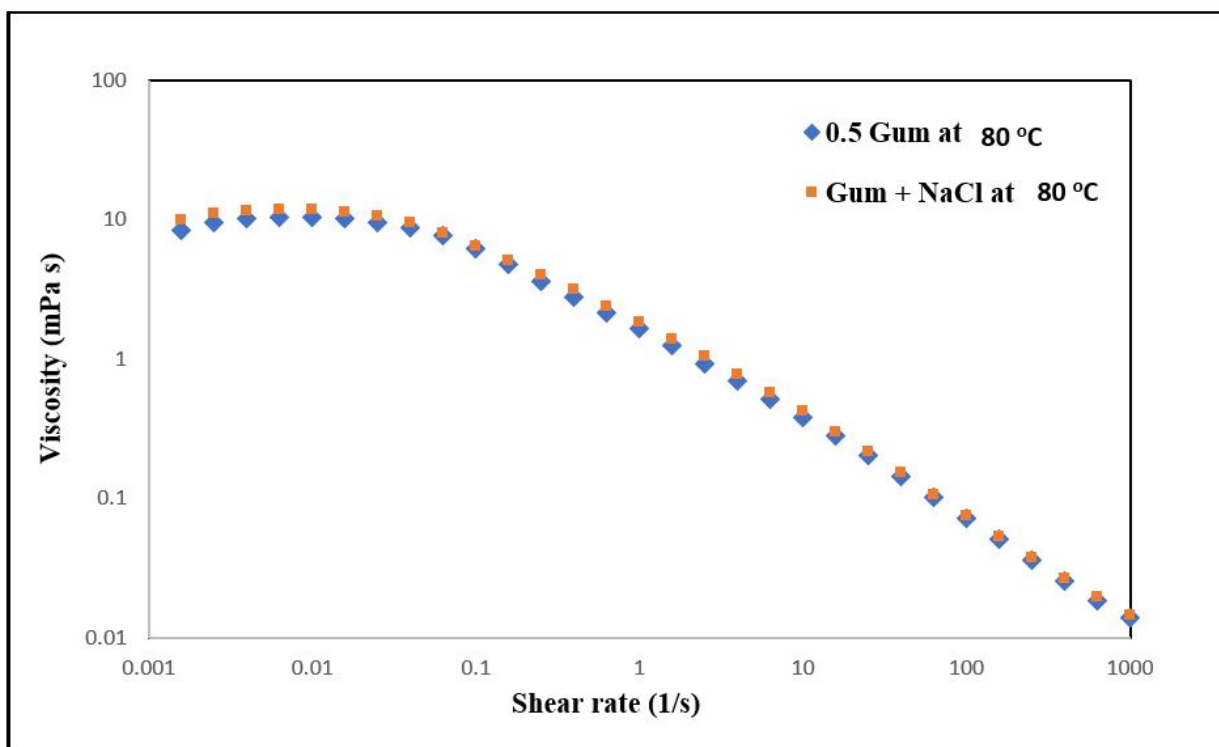

Figure S7. Effect of adding NaCl to 0.5% xanthan viscosity vs. shear rate at 80 °C.

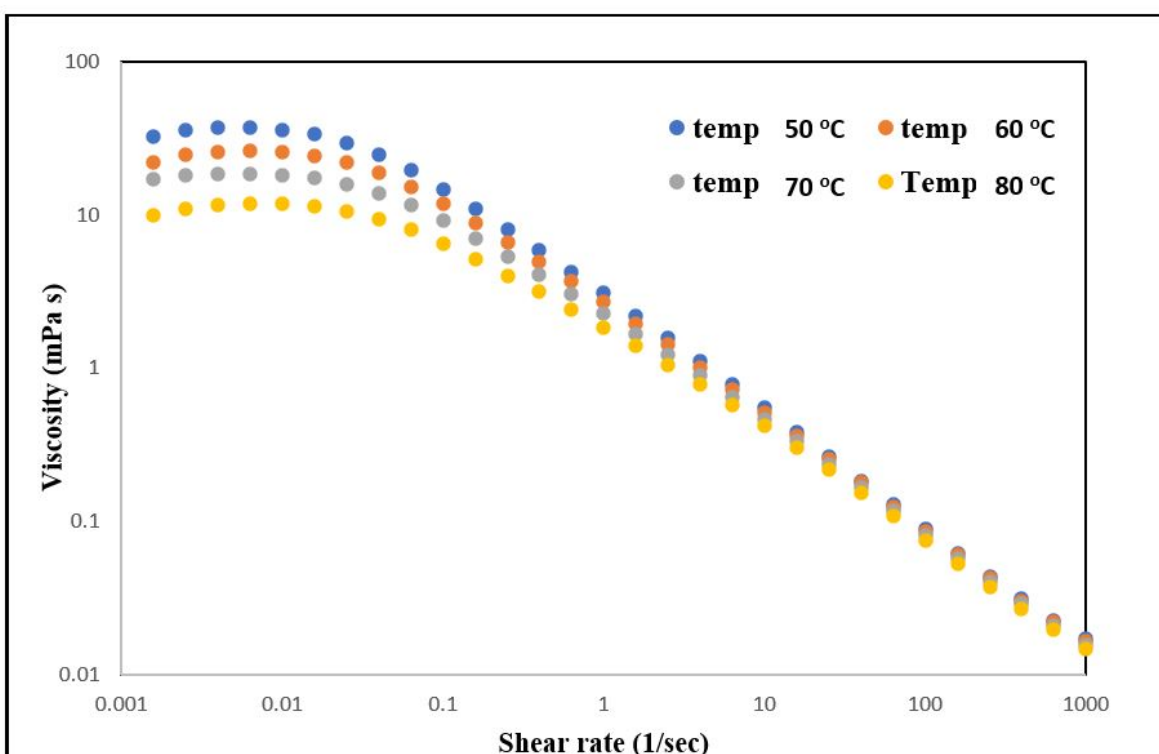

Figure S8. 0.5% xanthan (3% NaCl) vs. shear rate at different temperatures.

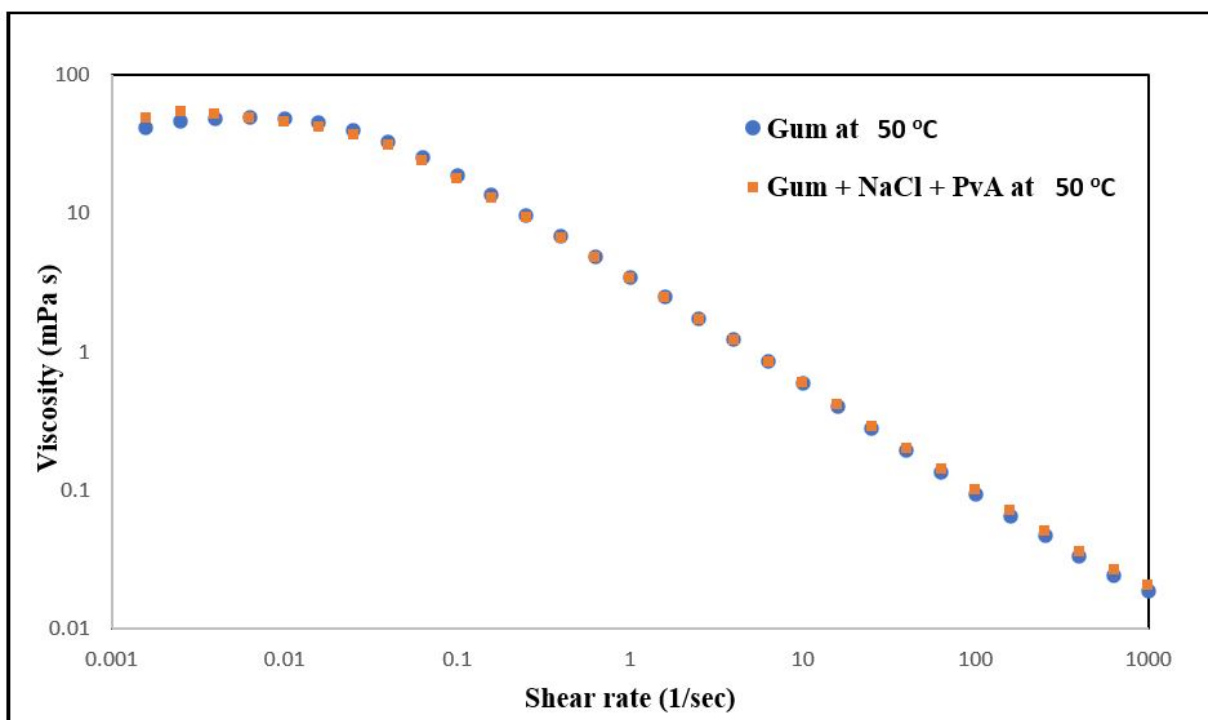

**Figure S9.** Effect of adding PVA to 0.5% xanthan viscosity vs. shear rate at 50 °C.

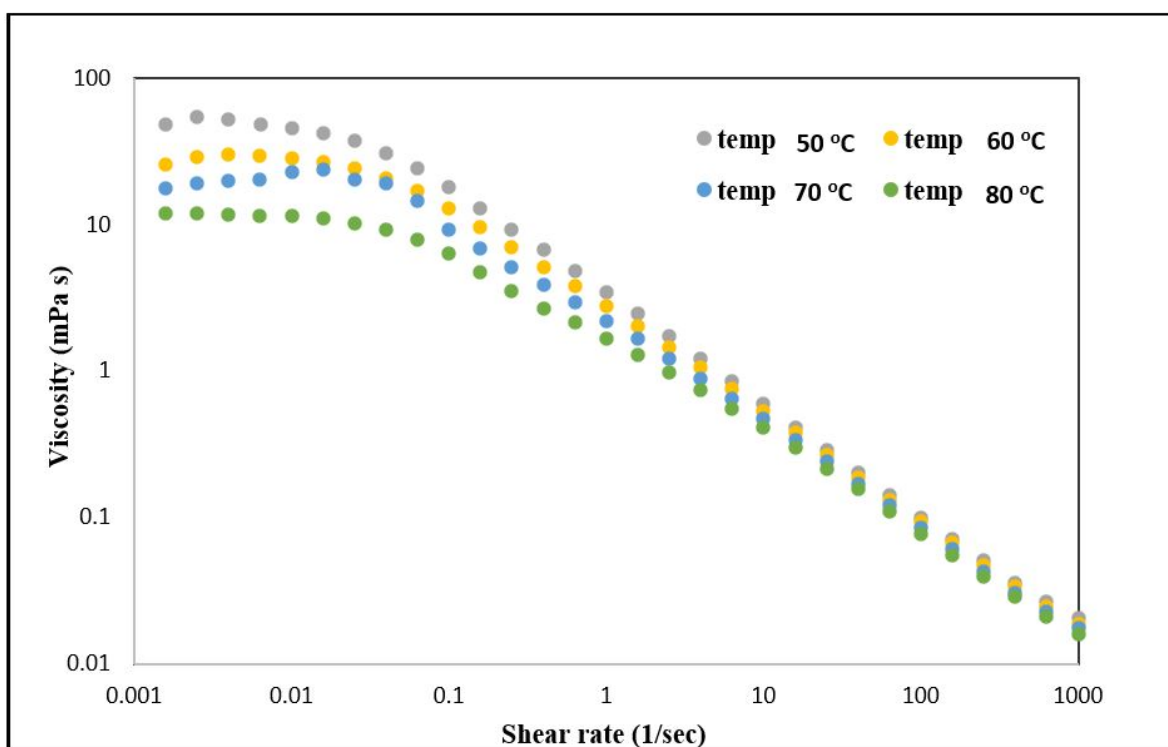

**Figure S10.** 0.5% xanthan viscosity vs. shear rate + 0.5% PVA at different temperatures.

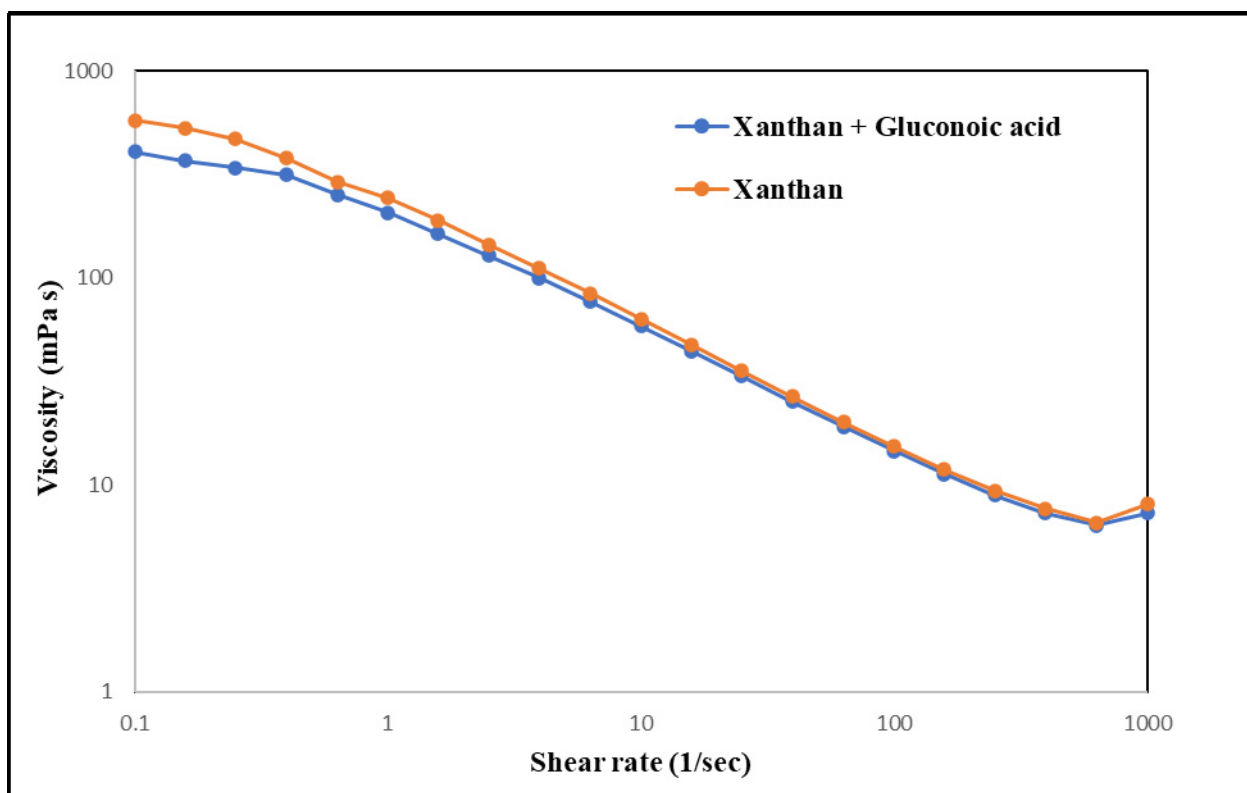

Figure S11. 1500 ppm xanthan and xanthan + gluconic acid viscosities vs. shear rate at 25 °C.

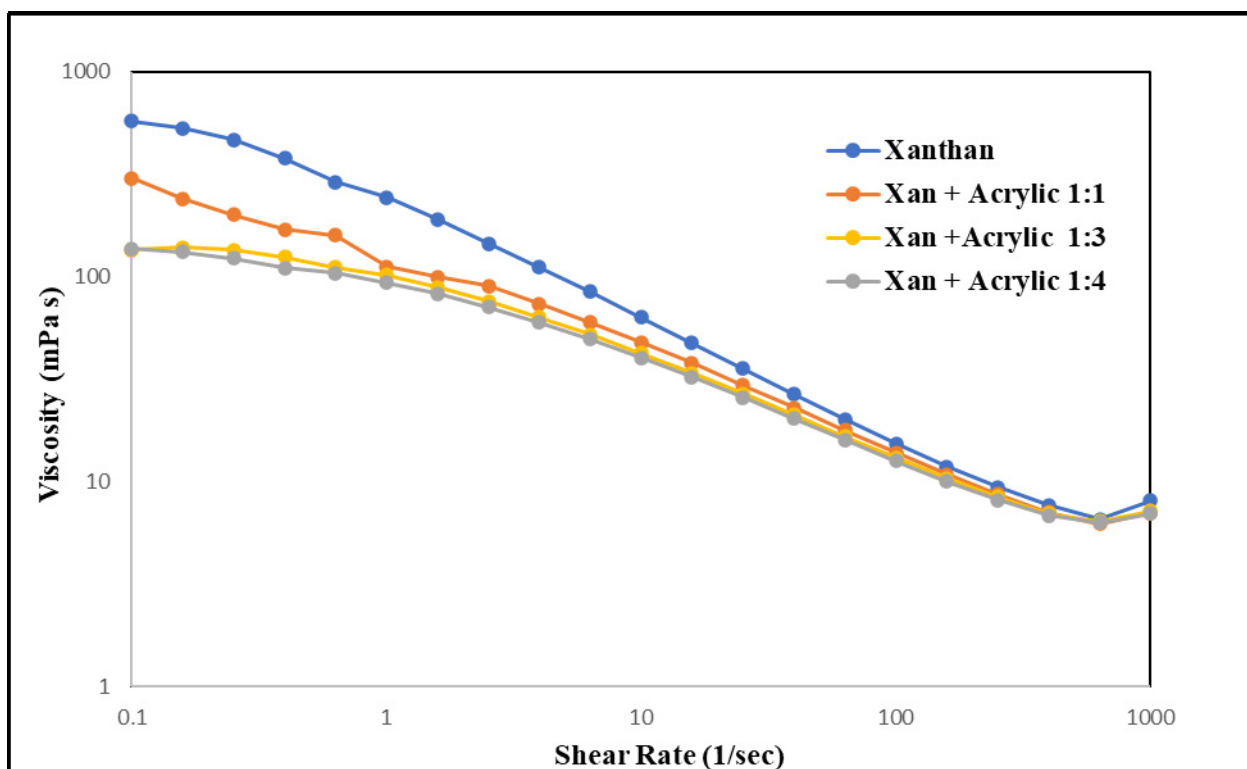

Figure S12. 1500 ppm xanthan and xanthan + acrylic acid (blending) viscosities vs. shear rate at 50 °C.

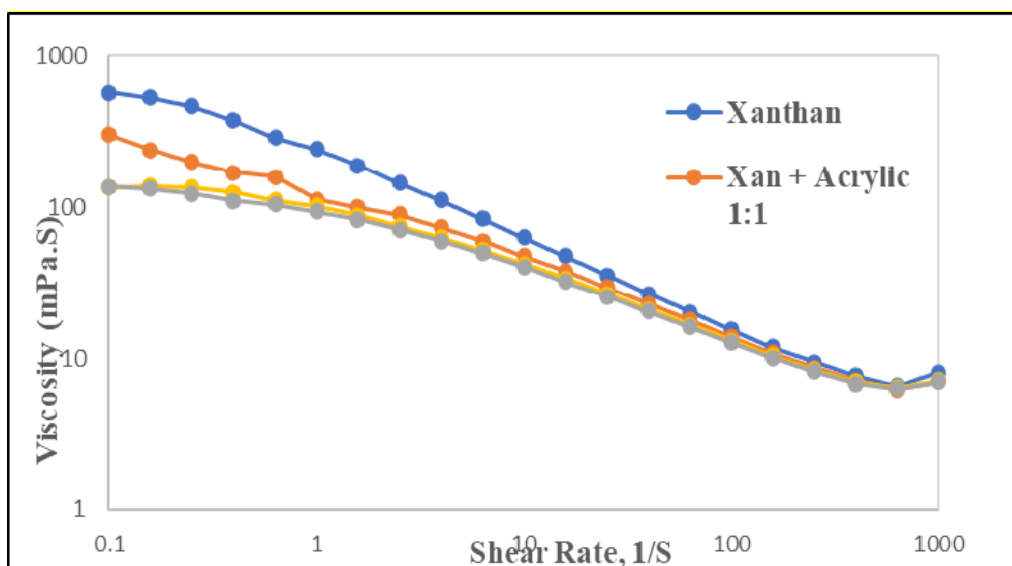

**Figure S13.** 1500 ppm xanthan and xanthan + acrylic acid (blending) viscosities vs. shear rate at 25 °C.

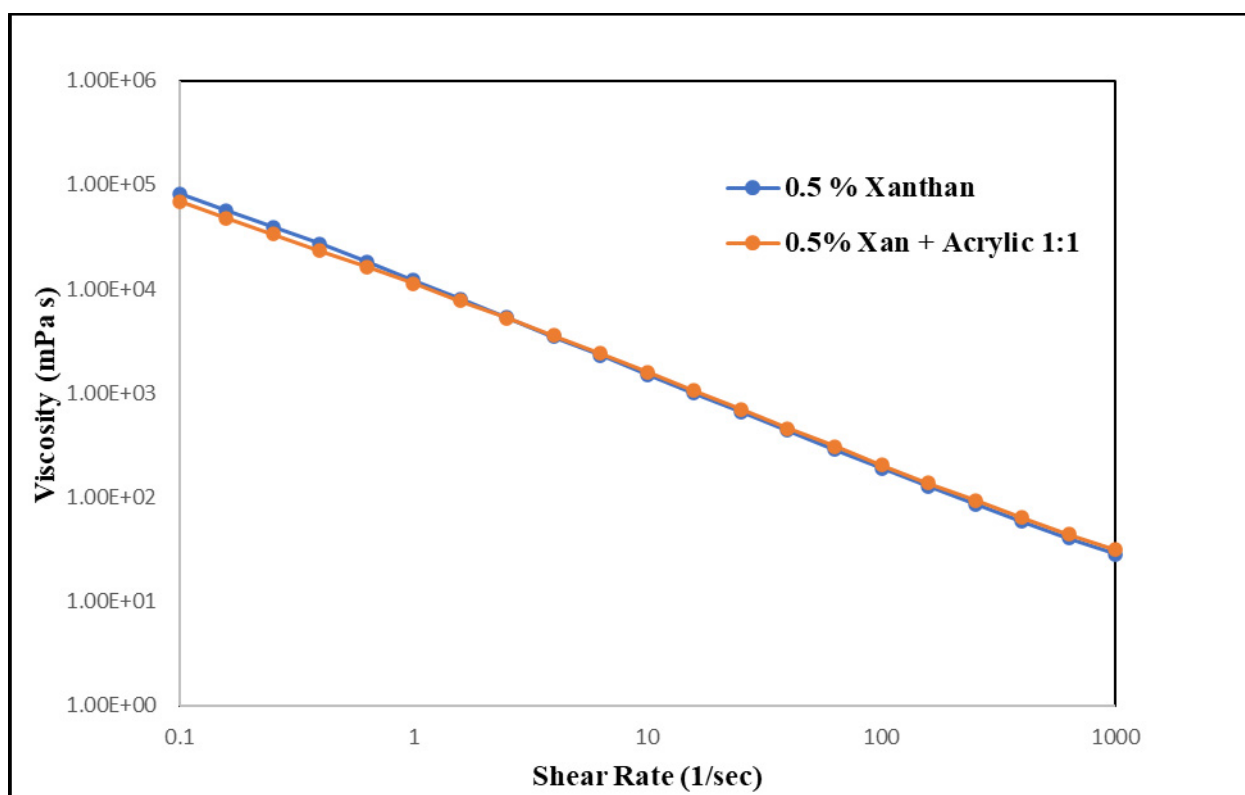

**Figure S14.** 0.5% xanthan and xanthan + acrylic acid (blending) viscosities vs. shear rate at 50 °C.

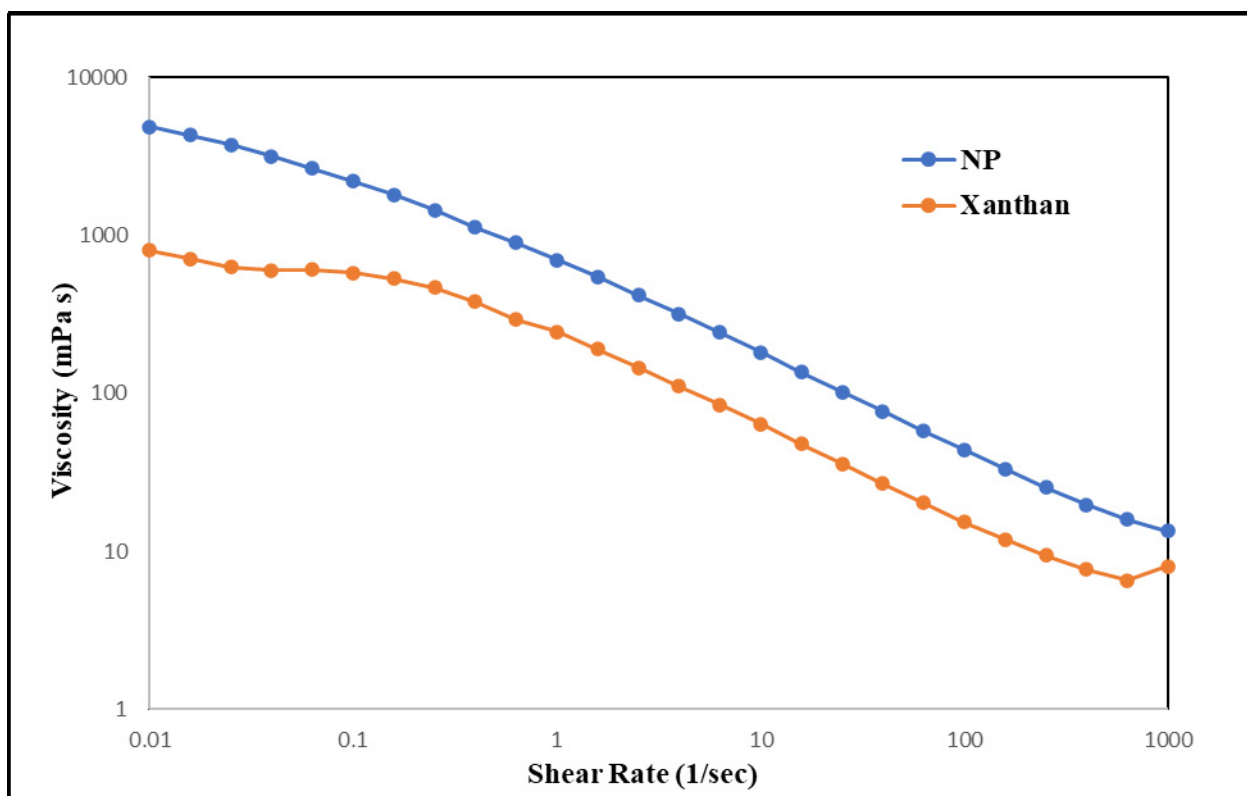

Figure S15. Xanthan Acrylate and xanthan viscosities vs. shear rate at 25 °C.

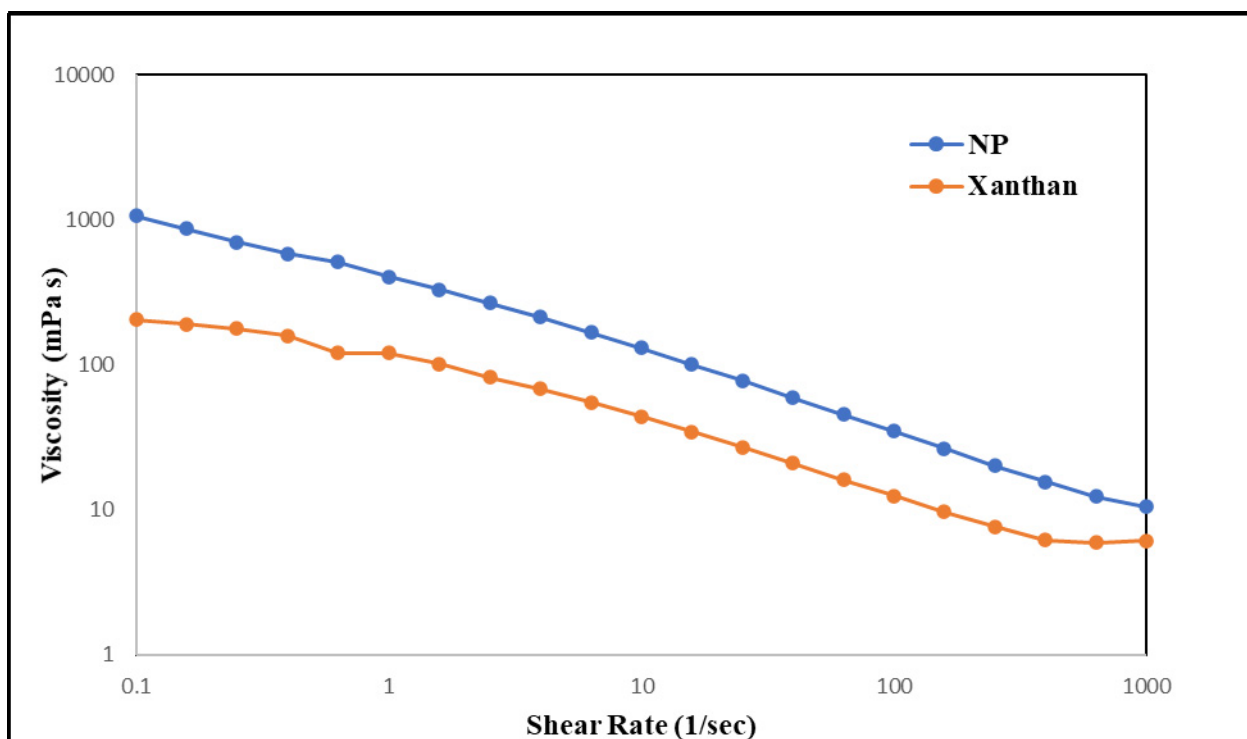

Figure S16. Xanthan Acrylate and xanthan viscosities vs. shear rate at 50 °C.

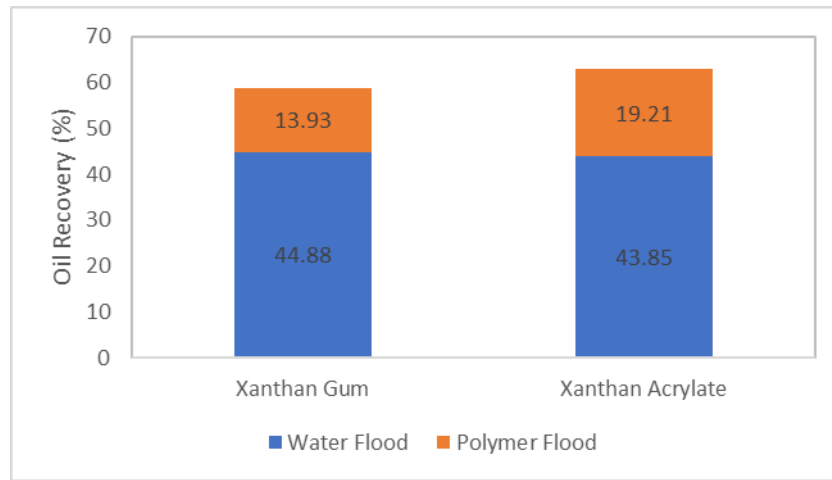

**Figure S17.** Comparison of oil recovery between xanthan gum and the new polymer.
